# Supplementary material
Source: Royal Society of Chemistry journal article supplement (doi:10.1039/d6ey00071a)
Supplement: d6ey00071a1.pdf [file d6ey00071a1.pdf]

*Supporting information*

In-situ Self-Segregation Construction of a Six-Metal  
LDH/Co-Mn-Oxide Heterostructure on Copper Foam for  
Alkaline Oxygen Evolution

Mingge Zhi<sup>a</sup>, Jinan Niu<sup>a,b\*</sup>, Chaoyao Yao<sup>a</sup>, Ruixuan Zhang<sup>a</sup>, Shunle Zhou<sup>a</sup>, Sonehra Anjum<sup>a</sup>, Fangfang Liu<sup>a,b</sup>, Yihan Ling<sup>a</sup>, Guiqing Liu<sup>c</sup>, Guohua Fan<sup>d</sup>, Arianit A. Reka<sup>e</sup>, Farid Akhtar<sup>f</sup>, Peizhong Feng<sup>a,b\*</sup>, Hermenegildo Garcia<sup>g,\*</sup>

<sup>a</sup>School of Materials Science and Physics, China University of Mining and Technology, Xuzhou 221116, China.

<sup>b</sup>Jiangsu Key Laboratory for Clean Utilization of Carbon Resources, China University of Mining and Technology, Xuzhou 221116, China

<sup>c</sup>Jiangsu BGRIMM Metal Recycling Science & Technology Co., Ltd., Xuzhou 221121, China

<sup>d</sup>Materials Academy of JITRI, Suzhou 215000, China

<sup>e</sup>Faculty of Natural Sciences and Mathematics, University of Tetova, Tetovo 1200, North Macedonia.

<sup>f</sup>Division of Materials Science, Luleå University of Technology, Luleå 97187, Sweden

<sup>g</sup>Instituto de Tecnología Química CSIC-UPV, Universitat Politècnica de València, Valencia 46022, Spain

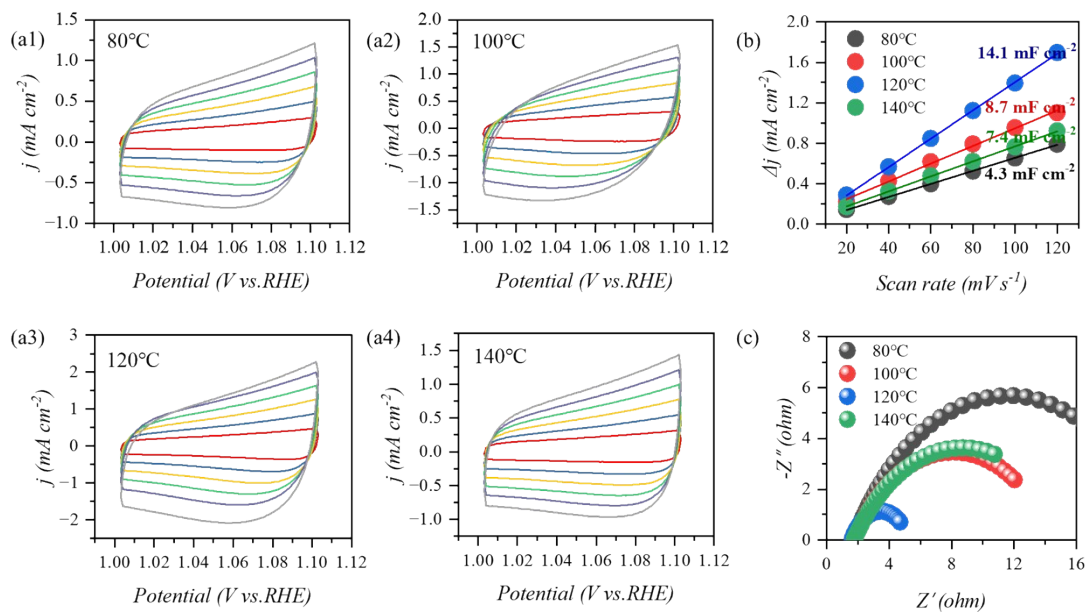

Fig.S1 Electrochemical performance testing of samples prepared at a series of hydrothermal temperatures: (a1-a4) CV at different scanning speeds of 20 mV s<sup>-1</sup>, 40 mV s<sup>-1</sup>, 60 mV s<sup>-1</sup>, 80 mV s<sup>-1</sup>, 100 mV s<sup>-1</sup>, 120 mV s<sup>-1</sup>, (b)  $C_{dl}$ , (c) EIS

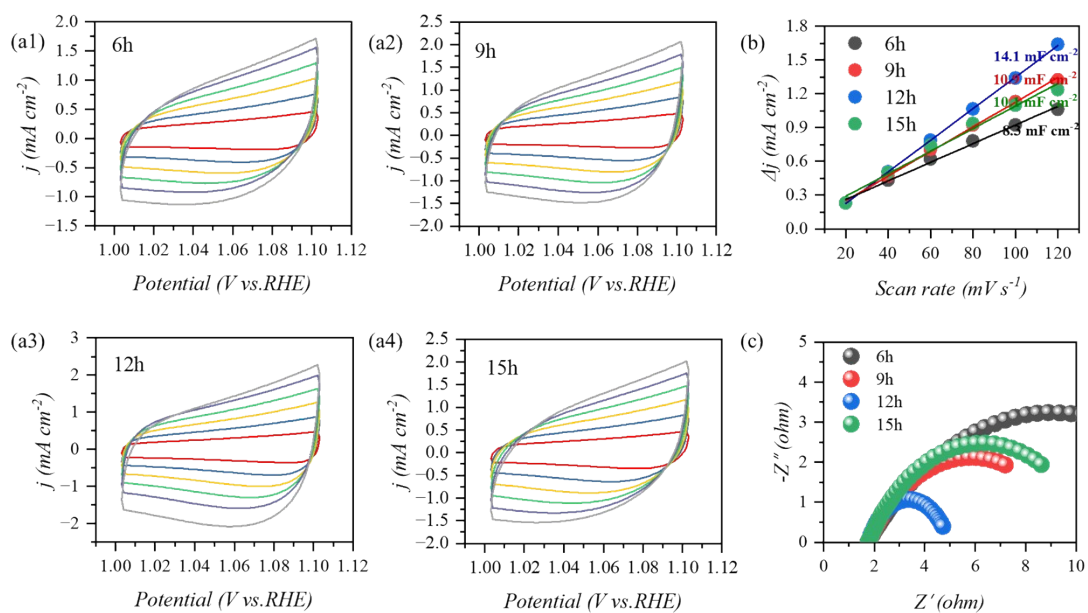

Fig.S2 Electrochemical performance testing of samples prepared at a series of hydrothermal time: (a1-a4) CV at different scanning speeds of  $20 \text{ mV s}^{-1}$ ,  $40 \text{ mV s}^{-1}$ ,  $60 \text{ mV s}^{-1}$ ,  $80 \text{ mV s}^{-1}$ ,  $100 \text{ mV s}^{-1}$ ,  $120 \text{ mV s}^{-1}$ , (b)  $C_{dl}$ , (c) EIS

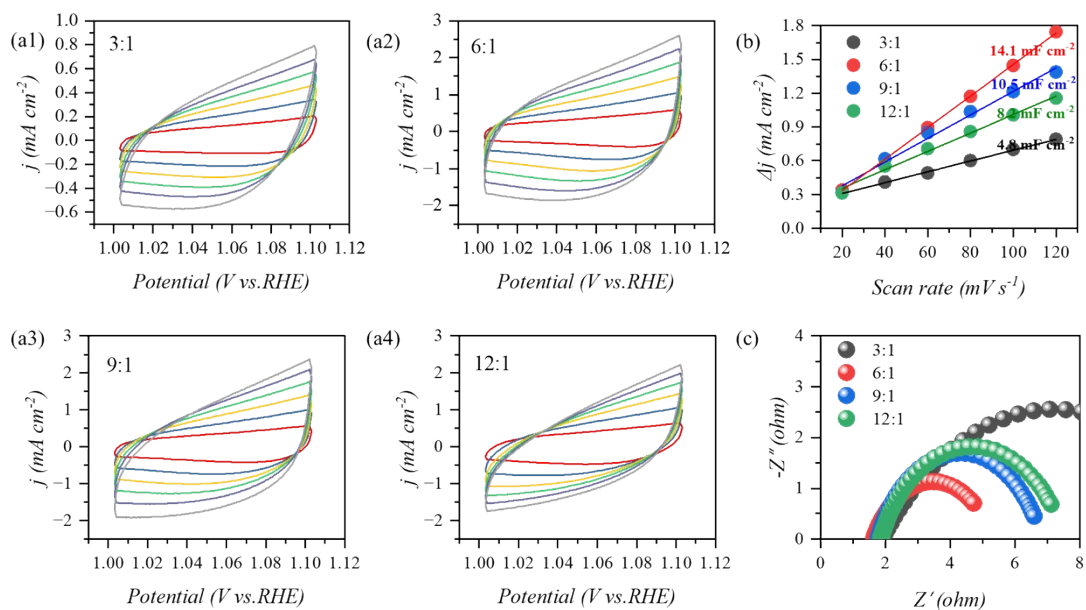

Fig.S3 Electrochemical performance testing of samples prepared at a series of Urea/M<sup>2+</sup> ratios: (a1-a4) CV at different scanning speeds of 20 mV s<sup>-1</sup>, 40 mV s<sup>-1</sup>, 60 mV s<sup>-1</sup>, 80 mV s<sup>-1</sup>, 100 mV s<sup>-1</sup>, 120 mV s<sup>-1</sup>, (b)  $C_{dl}$ , (c) EIS

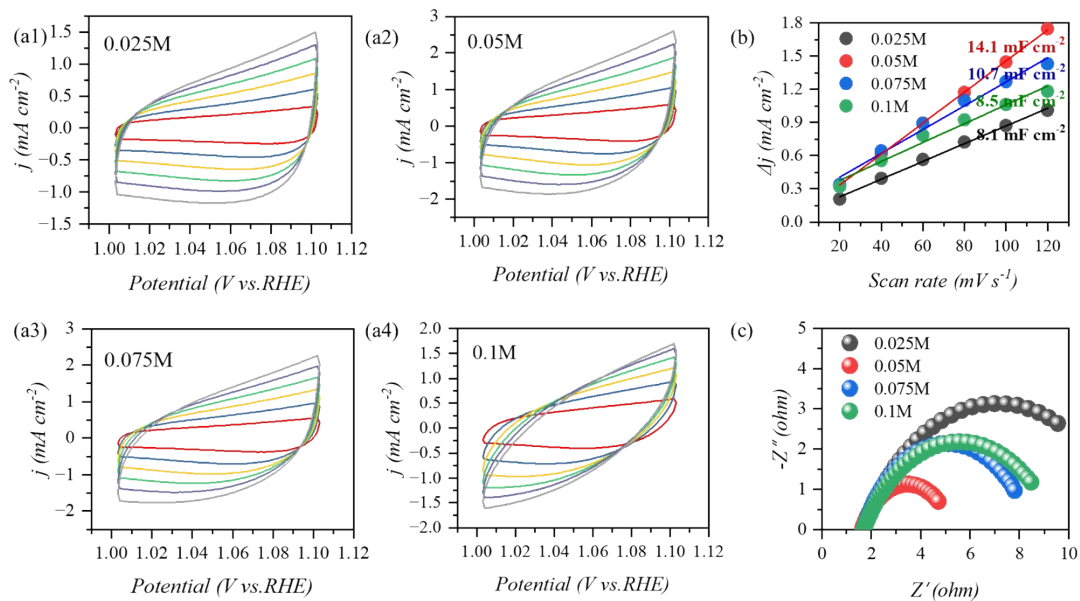

Fig.S4 Electrochemical performance testing of samples prepared at a series of  $M^{2+}$  concentrations: (a1-a4) CV at different scanning speeds of  $20 \text{ mV s}^{-1}$ ,  $40 \text{ mV s}^{-1}$ ,  $60 \text{ mV s}^{-1}$ ,  $80 \text{ mV s}^{-1}$ ,  $100 \text{ mV s}^{-1}$ ,  $120 \text{ mV s}^{-1}$ , (b)  $C_{dl}$ , (c) EIS

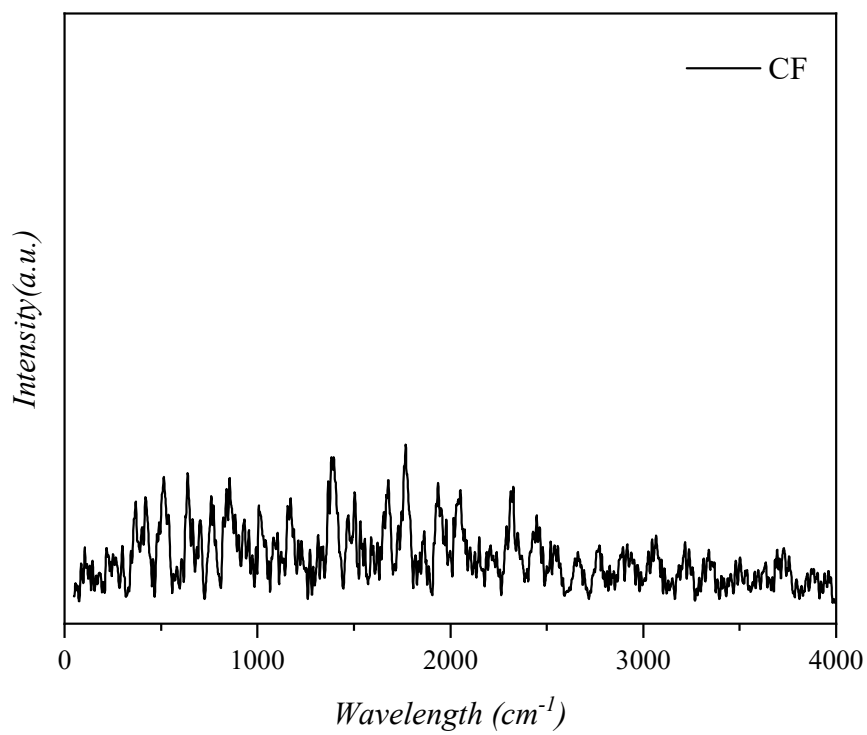

Fig.S5 Raman spectra of CF

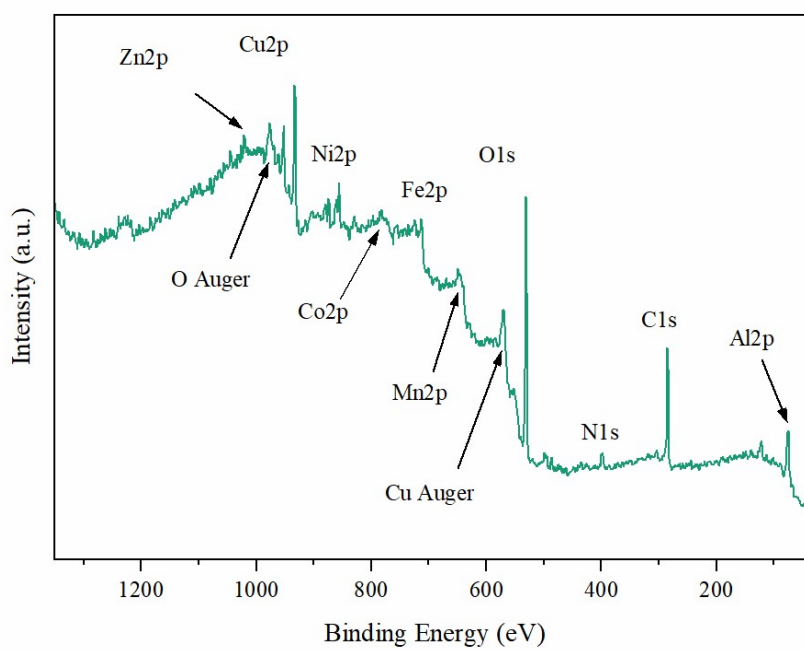

Fig.S6 the XPS survey spectrum of M6-LDH/CF

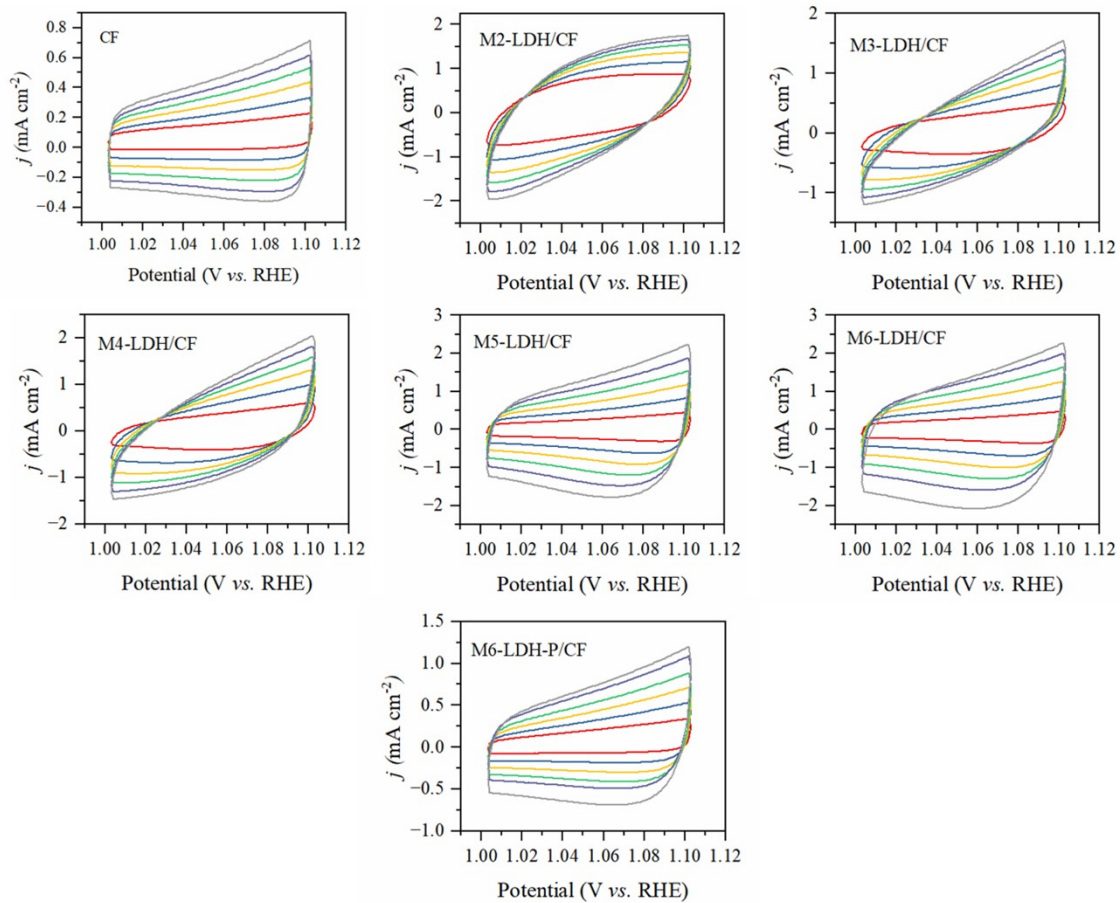

Fig.S7 CV testing of samples with different numbers of components at scanning speeds of  $20 \text{ mV s}^{-1}$ ,  $40 \text{ mV s}^{-1}$ ,  $60 \text{ mV s}^{-1}$ ,  $80 \text{ mV s}^{-1}$ ,  $100 \text{ mV s}^{-1}$ ,  $120 \text{ mV s}^{-1}$ , respectively

**Table S1 Overpotential of the samples at different current densities**

| Samples     | 10 (mA·cm <sup>-2</sup> ) | 50 (mA·cm <sup>-2</sup> ) | 100 (mA·cm <sup>-2</sup> ) |
|-------------|---------------------------|---------------------------|----------------------------|
| CF          | 333                       | 548                       | /                          |
| M6-LDH-P/CF | 313                       | 480                       | 634                        |
| M2-LDH/CF   | 296                       | 451                       | 630                        |
| M3-LDH/CF   | 257                       | 438                       | 603                        |
| M4-LDH/CF   | 256                       | 423                       | 592                        |
| M5-LDH/CF   | 212                       | 399                       | 558                        |
| M6-LDH/CF   | 181                       | 392                       | 502                        |

**Note:** Within the current measurement potential range (0.9~1.9 V vs. RHE), the current density of CF does not reach 100 mA·cm<sup>-2</sup>.

**Table S2 thermodynamic parameters under standard conditions (298.15 K)**

| Substance                    | State     | $\Delta H_f^0$ (kJ/mol) | $S^0$ (J/mol·K) | $\Delta G_f^0$ (kJ/mol) |
|------------------------------|-----------|-------------------------|-----------------|-------------------------|
| Cu                           | <i>s</i>  | 0                       | 33.1            | 0                       |
| Cu <sub>2</sub> O            | <i>s</i>  | -168.6                  | 93.1            | -146.0                  |
| CuO                          | <i>s</i>  | -157.3                  | 42.6            | -129.7                  |
| H <sub>2</sub> O             | <i>l</i>  | -285.8                  | 69.9            | -237.1                  |
| O <sub>2</sub>               | <i>g</i>  | 0                       | 205.1           | 0                       |
| NO <sub>3</sub> <sup>-</sup> | <i>aq</i> | -205.0                  | 146.4           | -108.7                  |
| NO <sub>2</sub> <sup>-</sup> | <i>aq</i> | -104.6                  | 145.6           | -37.2                   |
| OH <sup>-</sup>              | <i>aq</i> | -230.0                  | -10.75          | -157.2                  |

**Ionic state explanation:** For ions in aqueous solution, the parameters are measured under standard conditions of infinite dilution. In our calculations, we add a concentration correction term of 0.175 M to match the actual experimental environment.

### **Thermodynamics of CF surface oxidation by nitrate ions in alkaline hydrothermal conditions**

In the synthesis of the M6-LDH/CF sample, the initial concentration of nitrate ions was 0.175 mol/L, and the initial concentration of urea was 0.3 mol/L. Under such conditions, nitrate ions were used as the oxidizing agent to perform a non-standard thermodynamic derivation of the oxidation process of copper foam at 120°C in the alkaline hydrothermal environment. The two-stage redox reaction equations are as follows:

Stage I (Cu→Cu<sub>2</sub>O):

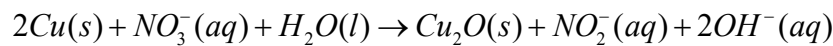

Stage II (Cu<sub>2</sub>O→CuO):

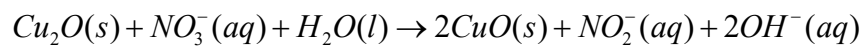

The formation free energy of each species at 298.15 K was obtained from the thermodynamic database (see Table S1), and the standard free energy change at 298.15 K was calculated as follows:

$$\Delta G_{I,298.15}^0 \approx -149.2 \text{ kJ/mol}$$

$$\Delta G_{II,298.15}^0 \approx -116.6 \text{ kJ/mol}$$

At the actual hydrothermal temperature of 393.15 K, the free energy change under non-standard conditions was derived using the formula  $\Delta G = \Delta G_T^0 + RT \ln Q$ . Since 0.3 mol/L urea in a closed system at 120°C typically stabilizes the pH around 10, the corresponding  $[\text{OH}^-]$  is approximately 0.01 mol/L. Additionally, assuming the generation of nitrite ions is minimal,  $[\text{NO}_2^-]$  is approximated as  $10^{-4}$  mol/L. The reaction quotient,  $Q$ , is given by:

$$Q = \frac{[\text{NO}_2^-][\text{OH}^-]^2}{[\text{NO}_3^-]} = \frac{10^{-4} \times 0.01^2}{0.175} \approx 5.71 \times 10^{-8}$$

Furthermore, the standard free energy change  $\Delta G_{298.15}^0$  at 298 K was corrected to the free energy  $\Delta G_{393.15}^0$  at 393.15 K (120°C) using the Gibbs-Helmholtz linear approximation method (where the standard reaction entropy  $\Delta S_{298.15}^0$  can be obtained from the standard entropy of each substance in the reaction):

$$\Delta G_{I,393.15}^0 \approx \Delta G_{I,298}^0 - (393.15 - 298.15) \times \Delta S_{I,298.15}^0 = -149.2 - 95 \times (-149.5) = -135.0 \text{ kJ/mol}$$

$$\Delta G_{II,393.15}^0 \approx \Delta G_{II,298}^0 - (393.15 - 298.15) \times \Delta S_{II,298.15}^0 = -116.6 - 95 \times (-122.1) = -105.0 \text{ kJ/mol}$$

Finally, the free energy changes for the two stages at 120°C were obtained using the formula  $\Delta G = \Delta G_T^0 + RT \ln Q$ :

$$\Delta G_I \approx -135000 + 8.314 \times 393.15 \times \ln(5.71 \times 10^{-8}) = -192.4 \text{ kJ/mol}$$

$$\Delta G_{II} \approx -105000 + 8.314 \times 393.15 \times \ln(5.71 \times 10^{-8}) = -162.4 \text{ kJ/mol}$$
